# Supplementary material for: Rethinking the X− + CH3Y [X = OH, SH, CN, NH2, PH2; Y = F, Cl, Br, I] SN2 reactions
Source: Royal Society of Chemistry journal article supplement (doi:10.1039/c8cp07850e), 2019-01-01
Supplement: c8cp07850e7.pdf [file c8cp07850e7.pdf]

# ELECTRONIC SUPPLEMENTARY INFORMATION

## Rethinking the $X^- + CH_3Y$ [ $X = OH, SH, CN, NH_2, PH_2$ ; $Y = F, Cl, Br, I$ ] $S_N2$ reactions

**Domonkos A. Tasi, Zita Fábrián, and Gábor Czako\***

Interdisciplinary Excellence Centre and Department of Physical Chemistry and Materials Science,  
Institute of Chemistry, University of Szeged, Rerrich Béla tér 1, Szeged H-6720, Hungary

\* gczako@chem.u-szeged.hu

### Content

Energies, structures, and frequencies for the stationary points of the potential energy surface of the  $CN^- + CH_3Y$  [ $Y = F, Cl, Br, I$ ]  $S_N2$  reactions obtained at different levels of theory

**Table S1.** Energies, structures, and frequencies for the PreMIN [Y = F, Cl, Br, I] ion-dipole complexes ( $C_{3v}$  symmetry)<sup>a</sup> obtained at different levels of theory

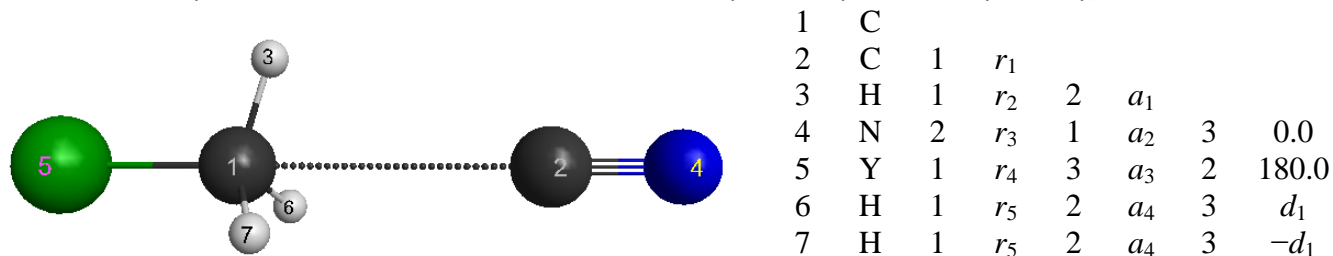

| Level <sup>b</sup>                | MP2/aug-cc-pVDZ                     |                                      |                                      |                                     | CCSD(T)-F12b/aug-cc-pVDZ            |                                      |                                      |                                     | CCSD(T)-F12b/aug-cc-pVTZ            |                                      |                                      |                                     |
|-----------------------------------|-------------------------------------|--------------------------------------|--------------------------------------|-------------------------------------|-------------------------------------|--------------------------------------|--------------------------------------|-------------------------------------|-------------------------------------|--------------------------------------|--------------------------------------|-------------------------------------|
|                                   | FCH <sub>3</sub> ...CN <sup>-</sup> | ClCH <sub>3</sub> ...CN <sup>-</sup> | BrCH <sub>3</sub> ...CN <sup>-</sup> | ICH <sub>3</sub> ...CN <sup>-</sup> | FCH <sub>3</sub> ...CN <sup>-</sup> | ClCH <sub>3</sub> ...CN <sup>-</sup> | BrCH <sub>3</sub> ...CN <sup>-</sup> | ICH <sub>3</sub> ...CN <sup>-</sup> | FCH <sub>3</sub> ...CN <sup>-</sup> | ClCH <sub>3</sub> ...CN <sup>-</sup> | BrCH <sub>3</sub> ...CN <sup>-</sup> | ICH <sub>3</sub> ...CN <sup>-</sup> |
| Energy [E <sub>h</sub> ]          | -232.053046                         | -592.062498                          | -548.026702                          | -427.171385                         | -232.327093                         | -592.306812                          | -548.267482                          | -427.407379                         | -232.363589                         | -592.353217                          | -548.316259                          | -427.447080                         |
| $r_1$ [Å]                         | 3.087                               | 3.052                                | 3.021                                | 2.995                               | 3.096                               | 3.073                                | 3.023                                | 3.004                               | 3.087                               | 3.061                                | 3.014                                | 2.994                               |
| $r_2$ [Å]                         | 1.094                               | 1.092                                | 1.092                                | 1.092                               | 1.087                               | 1.084                                | 1.082                                | 1.082                               | 1.085                               | 1.082                                | 1.081                                | 1.081                               |
| $r_3$ [Å]                         | 1.207                               | 1.206                                | 1.206                                | 1.206                               | 1.179                               | 1.179                                | 1.179                                | 1.179                               | 1.179                               | 1.179                                | 1.179                                | 1.179                               |
| $r_4$ [Å]                         | 1.440                               | 1.835                                | 1.989                                | 2.198                               | 1.410                               | 1.810                                | 1.979                                | 2.181                               | 1.411                               | 1.816                                | 1.981                                | 2.184                               |
| $r_5$ [Å]                         | 1.094                               | 1.092                                | 1.092                                | 1.092                               | 1.087                               | 1.084                                | 1.082                                | 1.082                               | 1.085                               | 1.082                                | 1.081                                | 1.081                               |
| $a_1$ [deg]                       | 71.6                                | 71.8                                 | 72.3                                 | 72.6                                | 70.9                                | 71.3                                 | 72.3                                 | 72.5                                | 71.0                                | 71.5                                 | 72.4                                 | 72.7                                |
| $a_2$ [deg]                       | 179.4                               | 179.8                                | 180.0                                | 180.0                               | 180.1                               | 181.1                                | 180.1                                | 180.1                               | 179.6                               | 180.2                                | 180.0                                | 180.0                               |
| $a_3$ [deg]                       | 108.4                               | 108.1                                | 107.7                                | 107.4                               | 109.1                               | 108.7                                | 107.7                                | 107.5                               | 109.0                               | 108.5                                | 107.6                                | 107.3                               |
| $a_4$ [deg]                       | 71.6                                | 71.9                                 | 72.3                                 | 72.6                                | 70.9                                | 71.3                                 | 72.3                                 | 72.5                                | 71.0                                | 71.5                                 | 72.4                                 | 72.7                                |
| $d_1$ [deg]                       | 120.0                               | 120.0                                | 120.0                                | 120.0                               | 120.0                               | 120.0                                | 120.0                                | 120.0                               | 120.0                               | 120.0                                | 120.0                                | 120.0                               |
| ZPE [cm <sup>-1</sup> ]           | 9803                                | 9431                                 | 9281                                 | 9136                                | 9838                                | 9469                                 | 9357                                 | 9189                                | 9846                                | 9470                                 | 9329                                 | 9178                                |
| $\omega_1$ [cm <sup>-1</sup> ]    | 28                                  | 23                                   | 23                                   | 18                                  | 31                                  | 35                                   | 39                                   | 31                                  | 31                                  | 23                                   | 26                                   | 20                                  |
| $\omega_2$ [cm <sup>-1</sup> ]    | 28                                  | 23                                   | 23                                   | 18                                  | 31                                  | 36                                   | 42                                   | 31                                  | 32                                  | 25                                   | 26                                   | 21                                  |
| $\omega_3$ [cm <sup>-1</sup> ]    | 115                                 | 101                                  | 95                                   | 87                                  | 113                                 | 87                                   | 95                                   | 85                                  | 112                                 | 90                                   | 91                                   | 83                                  |
| $\omega_4$ [cm <sup>-1</sup> ]    | 129                                 | 101                                  | 95                                   | 87                                  | 118                                 | 88                                   | 106                                  | 85                                  | 122                                 | 93                                   | 92                                   | 84                                  |
| $\omega_5$ [cm <sup>-1</sup> ]    | 129                                 | 111                                  | 103                                  | 100                                 | 119                                 | 109                                  | 108                                  | 99                                  | 123                                 | 108                                  | 102                                  | 97                                  |
| $\omega_6$ [cm <sup>-1</sup> ]    | 937                                 | 652                                  | 542                                  | 472                                 | 987                                 | 658                                  | 538                                  | 468                                 | 980                                 | 657                                  | 534                                  | 463                                 |
| $\omega_7$ [cm <sup>-1</sup> ]    | 1146                                | 999                                  | 939                                  | 876                                 | 1163                                | 1007                                 | 942                                  | 873                                 | 1162                                | 999                                  | 936                                  | 870                                 |
| $\omega_8$ [cm <sup>-1</sup> ]    | 1146                                | 999                                  | 939                                  | 876                                 | 1163                                | 1007                                 | 943                                  | 873                                 | 1162                                | 999                                  | 937                                  | 870                                 |
| $\omega_9$ [cm <sup>-1</sup> ]    | 1409                                | 1304                                 | 1258                                 | 1208                                | 1429                                | 1326                                 | 1271                                 | 1221                                | 1431                                | 1329                                 | 1273                                 | 1221                                |
| $\omega_{10}$ [cm <sup>-1</sup> ] | 1474                                | 1448                                 | 1439                                 | 1430                                | 1489                                | 1469                                 | 1462                                 | 1452                                | 1494                                | 1475                                 | 1465                                 | 1456                                |
| $\omega_{11}$ [cm <sup>-1</sup> ] | 1474                                | 1448                                 | 1439                                 | 1431                                | 1490                                | 1469                                 | 1463                                 | 1452                                | 1494                                | 1476                                 | 1466                                 | 1456                                |
| $\omega_{12}$ [cm <sup>-1</sup> ] | 1952                                | 1952                                 | 1952                                 | 1952                                | 2079                                | 2080                                 | 2082                                 | 2082                                | 2076                                | 2077                                 | 2078                                 | 2078                                |
| $\omega_{13}$ [cm <sup>-1</sup> ] | 3128                                | 3144                                 | 3145                                 | 3144                                | 3084                                | 3114                                 | 3124                                 | 3124                                | 3087                                | 3119                                 | 3126                                 | 3126                                |
| $\omega_{14}$ [cm <sup>-1</sup> ] | 3257                                | 3279                                 | 3285                                 | 3287                                | 3189                                | 3227                                 | 3249                                 | 3251                                | 3193                                | 3235                                 | 3252                                 | 3255                                |
| $\omega_{15}$ [cm <sup>-1</sup> ] | 3257                                | 3279                                 | 3285                                 | 3287                                | 3189                                | 3228                                 | 3249                                 | 3251                                | 3193                                | 3235                                 | 3252                                 | 3255                                |

<sup>a</sup> The computations are performed using  $C_s$  symmetry, but the  $C_{3v}$  symmetry, with collinear Y(5), C(1), C(2), N(4) atoms, is numerically obtained.

<sup>b</sup> For Br and I effective core potentials and the corresponding aug-cc-pVDZ-PP and aug-cc-pVTZ-PP basis sets are employed.

**Table S2.** Energies, structures, and frequencies for the FSMIN [Y = Cl, Br, I] front-side complexes ( $C_{3v}$  symmetry) obtained at different levels of theory

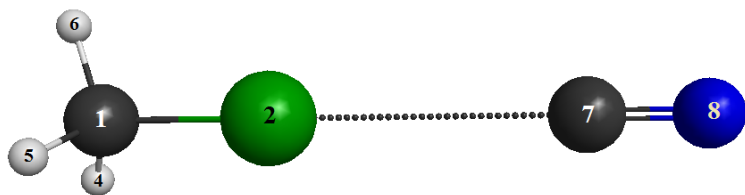

|   |   |   |       |   |       |   |        |  |  |
|---|---|---|-------|---|-------|---|--------|--|--|
| 1 | C |   |       |   |       |   |        |  |  |
| 2 | Y | 1 | $r_1$ |   |       |   |        |  |  |
| 3 | Q | 2 | 1.0   | 1 | 90.0  |   |        |  |  |
| 4 | H | 1 | $r_2$ | 2 | $a_1$ | 3 | 0.0    |  |  |
| 5 | H | 1 | $r_2$ | 2 | $a_1$ | 4 | 120.0  |  |  |
| 6 | H | 1 | $r_2$ | 2 | $a_1$ | 4 | -120.0 |  |  |
| 7 | C | 2 | $r_3$ | 3 | 90.0  | 1 | 180.0  |  |  |
| 8 | N | 2 | $r_4$ | 3 | 90.0  | 1 | 180.0  |  |  |

| Level <sup>a</sup>                | MP2/aug-cc-pVDZ                      |                                      |                                     | CCSD(T)-F12b/aug-cc-pVDZ             |                                      |                                     | CCSD(T)-F12b/aug-cc-pVTZ             |                                      |                                     |
|-----------------------------------|--------------------------------------|--------------------------------------|-------------------------------------|--------------------------------------|--------------------------------------|-------------------------------------|--------------------------------------|--------------------------------------|-------------------------------------|
|                                   | CH <sub>3</sub> Cl...CN <sup>-</sup> | CH <sub>3</sub> Br...CN <sup>-</sup> | CH <sub>3</sub> I...CN <sup>-</sup> | CH <sub>3</sub> Cl...CN <sup>-</sup> | CH <sub>3</sub> Br...CN <sup>-</sup> | CH <sub>3</sub> I...CN <sup>-</sup> | CH <sub>3</sub> Cl...CN <sup>-</sup> | CH <sub>3</sub> Br...CN <sup>-</sup> | CH <sub>3</sub> I...CN <sup>-</sup> |
| Energy [E <sub>h</sub> ]          | -592.044409                          | -548.015486                          | -427.171138                         | -592.290589                          | -548.256788                          | -427.407263                         | -592.336456                          | -548.305647                          | -427.447121                         |
| $r_1$ [Å]                         | 1.792                                | 1.966                                | 2.216                               | 1.770                                | 1.958                                | 2.200                               | 1.778                                | 1.960                                | 2.200                               |
| $r_2$ [Å]                         | 1.099                                | 1.099                                | 1.100                               | 1.090                                | 1.089                                | 1.090                               | 1.088                                | 1.087                                | 1.088                               |
| $r_3$ [Å]                         | 3.274                                | 2.949                                | 2.784                               | 3.179                                | 2.924                                | 2.774                               | 3.218                                | 2.913                                | 2.772                               |
| $r_4$ [Å]                         | 4.481                                | 4.155                                | 3.988                               | 4.359                                | 4.102                                | 3.950                               | 4.398                                | 4.091                                | 3.948                               |
| $a_1$ [deg]                       | 109.2                                | 109.2                                | 109.3                               | 109.6                                | 109.1                                | 109.2                               | 109.3                                | 108.9                                | 109.0                               |
| ZPE [cm <sup>-1</sup> ]           | 9386                                 | 9272                                 | 9129                                | 9418                                 | 9338                                 | 9185                                | 9454                                 | 9333                                 | 9181                                |
| $\omega_1$ [cm <sup>-1</sup> ]    | 24                                   | 50                                   | 68                                  | 35                                   | 52                                   | 72                                  | 35                                   | 55                                   | 68                                  |
| $\omega_2$ [cm <sup>-1</sup> ]    | 24                                   | 50                                   | 68                                  | 37                                   | 66                                   | 72                                  | 36                                   | 55                                   | 68                                  |
| $\omega_3$ [cm <sup>-1</sup> ]    | 68                                   | 100                                  | 130                                 | 59                                   | 104                                  | 134                                 | 69                                   | 104                                  | 135                                 |
| $\omega_4$ [cm <sup>-1</sup> ]    | 90                                   | 137                                  | 182                                 | 60                                   | 145                                  | 189                                 | 97                                   | 143                                  | 183                                 |
| $\omega_5$ [cm <sup>-1</sup> ]    | 90                                   | 137                                  | 182                                 | 80                                   | 148                                  | 189                                 | 97                                   | 143                                  | 183                                 |
| $\omega_6$ [cm <sup>-1</sup> ]    | 753                                  | 600                                  | 488                                 | 754                                  | 594                                  | 489                                 | 751                                  | 593                                  | 488                                 |
| $\omega_7$ [cm <sup>-1</sup> ]    | 1018                                 | 929                                  | 819                                 | 1037                                 | 934                                  | 820                                 | 1025                                 | 931                                  | 819                                 |
| $\omega_8$ [cm <sup>-1</sup> ]    | 1018                                 | 929                                  | 819                                 | 1037                                 | 936                                  | 820                                 | 1025                                 | 931                                  | 819                                 |
| $\omega_9$ [cm <sup>-1</sup> ]    | 1354                                 | 1292                                 | 1216                                | 1375                                 | 1304                                 | 1228                                | 1378                                 | 1304                                 | 1225                                |
| $\omega_{10}$ [cm <sup>-1</sup> ] | 1472                                 | 1462                                 | 1452                                | 1490                                 | 1482                                 | 1470                                | 1497                                 | 1486                                 | 1475                                |
| $\omega_{11}$ [cm <sup>-1</sup> ] | 1472                                 | 1462                                 | 1452                                | 1491                                 | 1484                                 | 1471                                | 1497                                 | 1486                                 | 1475                                |
| $\omega_{12}$ [cm <sup>-1</sup> ] | 1947                                 | 1955                                 | 1969                                | 2073                                 | 2084                                 | 2102                                | 2069                                 | 2081                                 | 2098                                |
| $\omega_{13}$ [cm <sup>-1</sup> ] | 3077                                 | 3074                                 | 3064                                | 3045                                 | 3052                                 | 3041                                | 3052                                 | 3054                                 | 3043                                |
| $\omega_{14}$ [cm <sup>-1</sup> ] | 3183                                 | 3184                                 | 3175                                | 3131                                 | 3146                                 | 3138                                | 3140                                 | 3150                                 | 3141                                |
| $\omega_{15}$ [cm <sup>-1</sup> ] | 3183                                 | 3184                                 | 3175                                | 3131                                 | 3146                                 | 3138                                | 3140                                 | 3150                                 | 3141                                |

<sup>a</sup> For Br and I effective core potentials and the corresponding aug-cc-pVDZ-PP and aug-cc-pVTZ-PP basis sets are employed.

**Table S3.** Energies, structures, and frequencies for the HMIN1 [Y = Br, I] H-bonded complexes ( $C_s$  symmetry) obtained at different levels of theory

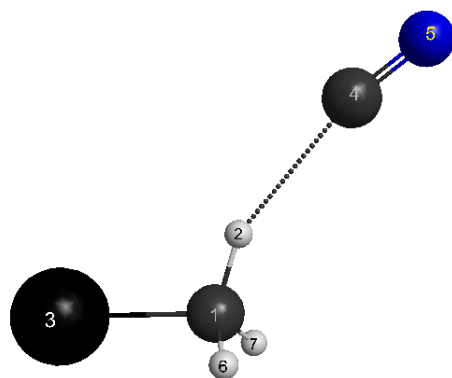

|   |   |   |       |   |       |   |        |  |
|---|---|---|-------|---|-------|---|--------|--|
| 1 | C |   |       |   |       |   |        |  |
| 2 | H | 1 | $r_1$ |   |       |   |        |  |
| 3 | Y | 1 | $r_2$ | 2 | $a_1$ |   |        |  |
| 4 | C | 2 | $r_3$ | 1 | $a_2$ | 3 | 180.0  |  |
| 5 | N | 4 | $r_4$ | 2 | $a_3$ | 1 | 0.0    |  |
| 6 | H | 1 | $r_5$ | 3 | $a_4$ | 2 | $d_1$  |  |
| 7 | H | 1 | $r_5$ | 3 | $a_4$ | 2 | $-d_1$ |  |

| Level <sup>a</sup>                | MP2/aug-cc-pVDZ                      |                                     | CCSD(T)-F12b/aug-cc-pVDZ             |                                     | CCSD(T)-F12b/aug-cc-pVTZ             |                                     |
|-----------------------------------|--------------------------------------|-------------------------------------|--------------------------------------|-------------------------------------|--------------------------------------|-------------------------------------|
|                                   | BrCH <sub>3</sub> ...CN <sup>-</sup> | ICH <sub>3</sub> ...CN <sup>-</sup> | BrCH <sub>3</sub> ...CN <sup>-</sup> | ICH <sub>3</sub> ...CN <sup>-</sup> | BrCH <sub>3</sub> ...CN <sup>-</sup> | ICH <sub>3</sub> ...CN <sup>-</sup> |
| Energy [E <sub>h</sub> ]          | -548.025289                          | -427.170680                         | -548.266155                          | -427.406722                         | -548.314890                          | -427.446322                         |
| $r_1$ [Å]                         | 1.101                                | 1.106                               | 1.089                                | 1.095                               | 1.088                                | 1.093                               |
| $r_2$ [Å]                         | 1.968                                | 2.171                               | 1.960                                | 2.155                               | 1.962                                | 2.157                               |
| $r_3$ [Å]                         | 2.331                                | 2.253                               | 2.395                                | 2.277                               | 2.388                                | 2.286                               |
| $r_4$ [Å]                         | 1.206                                | 1.206                               | 1.179                                | 1.179                               | 1.179                                | 1.179                               |
| $r_5$ [Å]                         | 1.096                                | 1.097                               | 1.086                                | 1.087                               | 1.084                                | 1.085                               |
| $a_1$ [deg]                       | 110.0                                | 109.1                               | 110.3                                | 109.3                               | 110.0                                | 109.2                               |
| $a_2$ [deg]                       | 151.5                                | 162.0                               | 141.4                                | 159.5                               | 140.7                                | 156.6                               |
| $a_3$ [deg]                       | 163.2                                | 167.6                               | 169.3                                | 171.7                               | 163.9                                | 167.8                               |
| $a_4$ [deg]                       | 106.6                                | 106.3                               | 106.7                                | 106.3                               | 106.6                                | 106.2                               |
| $d_1$ [deg]                       | 120.7                                | 120.8                               | 120.5                                | 120.7                               | 120.5                                | 120.7                               |
| ZPE [cm <sup>-1</sup> ]           | 9322                                 | 9231                                | 9340                                 | 9276                                | 9340                                 | 9255                                |
| $\omega_1$ [cm <sup>-1</sup> ]    | 16                                   | 28                                  | 8i                                   | 35                                  | 11i                                  | 35                                  |
| $\omega_2$ [cm <sup>-1</sup> ]    | 37                                   | 46                                  | 38                                   | 56                                  | 35                                   | 44                                  |
| $\omega_3$ [cm <sup>-1</sup> ]    | 44                                   | 58                                  | 46                                   | 69                                  | 37                                   | 56                                  |
| $\omega_4$ [cm <sup>-1</sup> ]    | 143                                  | 160                                 | 126                                  | 153                                 | 129                                  | 152                                 |
| $\omega_5$ [cm <sup>-1</sup> ]    | 187                                  | 217                                 | 159                                  | 196                                 | 148                                  | 180                                 |
| $\omega_6$ [cm <sup>-1</sup> ]    | 594                                  | 531                                 | 588                                  | 527                                 | 584                                  | 523                                 |
| $\omega_7$ [cm <sup>-1</sup> ]    | 953                                  | 919                                 | 940                                  | 914                                 | 942                                  | 909                                 |
| $\omega_8$ [cm <sup>-1</sup> ]    | 980                                  | 921                                 | 977                                  | 918                                 | 976                                  | 915                                 |
| $\omega_9$ [cm <sup>-1</sup> ]    | 1334                                 | 1305                                | 1335                                 | 1311                                | 1337                                 | 1308                                |
| $\omega_{10}$ [cm <sup>-1</sup> ] | 1453                                 | 1447                                | 1468                                 | 1463                                | 1473                                 | 1466                                |
| $\omega_{11}$ [cm <sup>-1</sup> ] | 1481                                 | 1481                                | 1492                                 | 1497                                | 1499                                 | 1499                                |
| $\omega_{12}$ [cm <sup>-1</sup> ] | 1952                                 | 1954                                | 2081                                 | 2084                                | 2077                                 | 2080                                |
| $\omega_{13}$ [cm <sup>-1</sup> ] | 3052                                 | 3001                                | 3059                                 | 2994                                | 3061                                 | 3000                                |
| $\omega_{14}$ [cm <sup>-1</sup> ] | 3192                                 | 3174                                | 3178                                 | 3146                                | 3181                                 | 3150                                |
| $\omega_{15}$ [cm <sup>-1</sup> ] | 3224                                 | 3221                                | 3194                                 | 3188                                | 3200                                 | 3193                                |

<sup>a</sup> For Br and I effective core potentials and the corresponding aug-cc-pVDZ-PP and aug-cc-pVTZ-PP basis sets are employed.

**Table S4.** Energies, structures, and frequencies for the HMIN2 [Y = F, Cl, Br, I] H-bonded complexes ( $C_s$  symmetry) obtained at different levels of theory

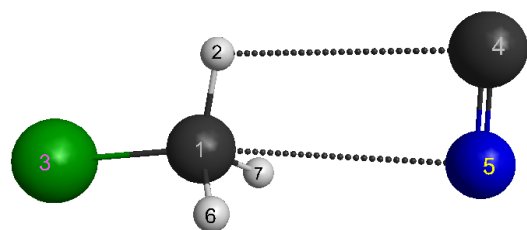

|   |   |   |       |   |       |   |        |  |  |  |  |  |
|---|---|---|-------|---|-------|---|--------|--|--|--|--|--|
| 1 | C |   |       |   |       |   |        |  |  |  |  |  |
| 2 | H | 1 | $r_1$ |   |       |   |        |  |  |  |  |  |
| 3 | Y | 1 | $r_2$ | 2 | $a_1$ |   |        |  |  |  |  |  |
| 4 | C | 2 | $r_3$ | 1 | $a_2$ | 3 | 180.0  |  |  |  |  |  |
| 5 | N | 4 | $r_4$ | 2 | $a_3$ | 1 | 0.0    |  |  |  |  |  |
| 6 | H | 1 | $r_5$ | 3 | $a_4$ | 2 | $d_1$  |  |  |  |  |  |
| 7 | H | 1 | $r_5$ | 3 | $a_4$ | 2 | $-d_1$ |  |  |  |  |  |

| Level <sup>a</sup>                | MP2/aug-cc-pVDZ                     |                                      |                                      |                                     | CCSD(T)-F12b/aug-cc-pVDZ            |                                      |                                      |                                     | CCSD(T)-F12b/aug-cc-pVTZ            |                                      |                                      |                                     |
|-----------------------------------|-------------------------------------|--------------------------------------|--------------------------------------|-------------------------------------|-------------------------------------|--------------------------------------|--------------------------------------|-------------------------------------|-------------------------------------|--------------------------------------|--------------------------------------|-------------------------------------|
|                                   | FCH <sub>3</sub> ...CN <sup>-</sup> | ClCH <sub>3</sub> ...CN <sup>-</sup> | BrCH <sub>3</sub> ...CN <sup>-</sup> | ICH <sub>3</sub> ...CN <sup>-</sup> | FCH <sub>3</sub> ...CN <sup>-</sup> | ClCH <sub>3</sub> ...CN <sup>-</sup> | BrCH <sub>3</sub> ...CN <sup>-</sup> | ICH <sub>3</sub> ...CN <sup>-</sup> | FCH <sub>3</sub> ...CN <sup>-</sup> | ClCH <sub>3</sub> ...CN <sup>-</sup> | BrCH <sub>3</sub> ...CN <sup>-</sup> | ICH <sub>3</sub> ...CN <sup>-</sup> |
| <b>Energy [E<sub>h</sub>]</b>     | -232.054023                         | -592.063847                          | -548.028010                          | -427.172721                         | -232.327906                         | -592.307919                          | -548.268516                          | -427.408458                         | -232.364358                         | -592.354294                          | -548.317302                          | -427.448180                         |
| $r_1$ [Å]                         | 1.095                               | 1.093                                | 1.093                                | 1.093                               | 1.087                               | 1.085                                | 1.083                                | 1.084                               | 1.086                               | 1.083                                | 1.082                                | 1.082                               |
| $r_2$ [Å]                         | 1.439                               | 1.831                                | 1.983                                | 2.189                               | 1.409                               | 1.807                                | 1.972                                | 2.173                               | 1.411                               | 1.813                                | 1.975                                | 2.175                               |
| $r_3$ [Å]                         | 2.887                               | 2.809                                | 2.787                                | 2.765                               | 2.883                               | 2.829                                | 2.807                                | 2.782                               | 2.875                               | 2.823                                | 2.800                                | 2.774                               |
| $r_4$ [Å]                         | 1.208                               | 1.208                                | 1.208                                | 1.208                               | 1.180                               | 1.180                                | 1.180                                | 1.180                               | 1.180                               | 1.180                                | 1.180                                | 1.180                               |
| $r_5$ [Å]                         | 1.095                               | 1.093                                | 1.092                                | 1.093                               | 1.087                               | 1.084                                | 1.083                                | 1.082                               | 1.085                               | 1.082                                | 1.081                                | 1.081                               |
| $a_1$ [deg]                       | 108.6                               | 108.4                                | 108.0                                | 107.9                               | 109.2                               | 108.9                                | 108.0                                | 107.8                               | 109.1                               | 108.6                                | 107.8                                | 107.7                               |
| $a_2$ [deg]                       | 104.7                               | 103.8                                | 102.6                                | 102.4                               | 104.7                               | 103.1                                | 102.2                                | 102.1                               | 104.5                               | 103.3                                | 102.2                                | 102.0                               |
| $a_3$ [deg]                       | 81.6                                | 85.5                                 | 87.2                                 | 88.0                                | 83.0                                | 86.7                                 | 87.1                                 | 88.2                                | 83.3                                | 86.3                                 | 87.1                                 | 88.6                                |
| $a_4$ [deg]                       | 108.4                               | 108.1                                | 107.7                                | 107.5                               | 109.0                               | 108.7                                | 107.8                                | 107.6                               | 109.0                               | 108.5                                | 107.6                                | 107.4                               |
| $d_1$ [deg]                       | 120.1                               | 120.1                                | 120.1                                | 120.1                               | 120.1                               | 120.1                                | 120.1                                | 120.1                               | 120.1                               | 120.1                                | 120.1                                | 120.1                               |
| <b>ZPE [cm<sup>-1</sup>]</b>      | 9799                                | 9446                                 | 9293                                 | 9154                                | 9832                                | 9454                                 | 9351                                 | 9199                                | 9857                                | 9478                                 | 9334                                 | 9203                                |
| $\omega_1$ [cm <sup>-1</sup> ]    | 12i                                 | 6                                    | 20i                                  | 31i                                 | 36i                                 | 42i                                  | 29                                   | 3                                   | 31                                  | 35i                                  | 33i                                  | 10                                  |
| $\omega_2$ [cm <sup>-1</sup> ]    | 52                                  | 67                                   | 68                                   | 64                                  | 57                                  | 44                                   | 71                                   | 65                                  | 58                                  | 66                                   | 69                                   | 66                                  |
| $\omega_3$ [cm <sup>-1</sup> ]    | 108                                 | 85                                   | 79                                   | 71                                  | 96                                  | 66                                   | 74                                   | 69                                  | 100                                 | 74                                   | 71                                   | 69                                  |
| $\omega_4$ [cm <sup>-1</sup> ]    | 110                                 | 86                                   | 79                                   | 74                                  | 102                                 | 75                                   | 84                                   | 75                                  | 104                                 | 78                                   | 74                                   | 74                                  |
| $\omega_5$ [cm <sup>-1</sup> ]    | 133                                 | 127                                  | 116                                  | 113                                 | 127                                 | 122                                  | 114                                  | 110                                 | 127                                 | 120                                  | 113                                  | 109                                 |
| $\omega_6$ [cm <sup>-1</sup> ]    | 946                                 | 667                                  | 562                                  | 497                                 | 994                                 | 670                                  | 559                                  | 491                                 | 987                                 | 671                                  | 555                                  | 488                                 |
| $\omega_7$ [cm <sup>-1</sup> ]    | 1149                                | 1002                                 | 942                                  | 878                                 | 1166                                | 1007                                 | 941                                  | 874                                 | 1166                                | 1001                                 | 938                                  | 873                                 |
| $\omega_8$ [cm <sup>-1</sup> ]    | 1151                                | 1005                                 | 944                                  | 880                                 | 1169                                | 1014                                 | 944                                  | 879                                 | 1169                                | 1005                                 | 943                                  | 878                                 |
| $\omega_9$ [cm <sup>-1</sup> ]    | 1425                                | 1322                                 | 1279                                 | 1234                                | 1445                                | 1343                                 | 1292                                 | 1244                                | 1446                                | 1346                                 | 1294                                 | 1246                                |
| $\omega_{10}$ [cm <sup>-1</sup> ] | 1474                                | 1448                                 | 1439                                 | 1431                                | 1490                                | 1470                                 | 1462                                 | 1453                                | 1495                                | 1476                                 | 1466                                 | 1458                                |
| $\omega_{11}$ [cm <sup>-1</sup> ] | 1479                                | 1455                                 | 1446                                 | 1437                                | 1495                                | 1474                                 | 1465                                 | 1458                                | 1499                                | 1480                                 | 1470                                 | 1462                                |
| $\omega_{12}$ [cm <sup>-1</sup> ] | 1943                                | 1942                                 | 1941                                 | 1940                                | 2070                                | 2069                                 | 2069                                 | 2068                                | 2067                                | 2066                                 | 2065                                 | 2065                                |
| $\omega_{13}$ [cm <sup>-1</sup> ] | 3123                                | 3138                                 | 3138                                 | 3136                                | 3081                                | 3109                                 | 3118                                 | 3119                                | 3084                                | 3114                                 | 3120                                 | 3119                                |
| $\omega_{14}$ [cm <sup>-1</sup> ] | 3252                                | 3271                                 | 3276                                 | 3276                                | 3186                                | 3220                                 | 3238                                 | 3242                                | 3190                                | 3228                                 | 3243                                 | 3244                                |
| $\omega_{15}$ [cm <sup>-1</sup> ] | 3252                                | 3273                                 | 3278                                 | 3278                                | 3186                                | 3224                                 | 3242                                 | 3247                                | 3191                                | 3231                                 | 3247                                 | 3247                                |

<sup>a</sup> For Br and I effective core potentials and the corresponding aug-cc-pVDZ-PP and aug-cc-pVTZ-PP basis sets are employed.

**Table S5.** Energies, structures, and frequencies for the WaldenTS [Y = F, Cl, Br, I] transition states ( $C_{3v}$  symmetry) obtained at different levels of theory

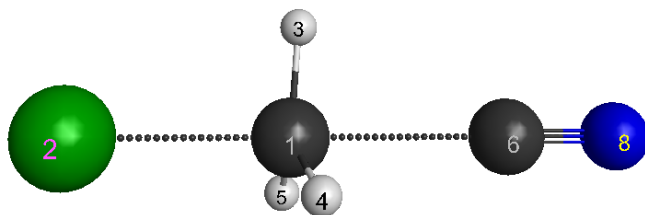

|   |   |   |       |   |               |   |        |  |  |  |  |  |
|---|---|---|-------|---|---------------|---|--------|--|--|--|--|--|
| 1 | C |   |       |   |               |   |        |  |  |  |  |  |
| 2 | Y | 1 | $r_1$ |   |               |   |        |  |  |  |  |  |
| 3 | H | 1 | $r_2$ | 2 | $a_1$         |   |        |  |  |  |  |  |
| 4 | H | 1 | $r_2$ | 2 | $a_1$         | 3 | 120.0  |  |  |  |  |  |
| 5 | H | 1 | $r_2$ | 2 | $a_1$         | 3 | -120.0 |  |  |  |  |  |
| 6 | C | 1 | $r_3$ | 3 | $180.0 - a_1$ | 2 | 180.0  |  |  |  |  |  |
| 7 | Q | 6 | 1     | 1 | 90.0          | 3 | 0      |  |  |  |  |  |
| 8 | N | 6 | $r_4$ | 7 | 90.0          | 3 | 180.0  |  |  |  |  |  |

| Level <sup>a</sup>                | MP2/aug-cc-pVDZ                     |                                      |                                      |                                     | CCSD(T)-F12b/aug-cc-pVDZ            |                                      |                                      |                                     | CCSD(T)-F12b/aug-cc-pVTZ            |                                      |                                      |                                     |
|-----------------------------------|-------------------------------------|--------------------------------------|--------------------------------------|-------------------------------------|-------------------------------------|--------------------------------------|--------------------------------------|-------------------------------------|-------------------------------------|--------------------------------------|--------------------------------------|-------------------------------------|
|                                   | [F-CH <sub>3</sub> CN] <sup>-</sup> | [Cl-CH <sub>3</sub> CN] <sup>-</sup> | [Br-CH <sub>3</sub> CN] <sup>-</sup> | [I-CH <sub>3</sub> CN] <sup>-</sup> | [F-CH <sub>3</sub> CN] <sup>-</sup> | [Cl-CH <sub>3</sub> CN] <sup>-</sup> | [Br-CH <sub>3</sub> CN] <sup>-</sup> | [I-CH <sub>3</sub> CN] <sup>-</sup> | [F-CH <sub>3</sub> CN] <sup>-</sup> | [Cl-CH <sub>3</sub> CN] <sup>-</sup> | [Br-CH <sub>3</sub> CN] <sup>-</sup> | [I-CH <sub>3</sub> CN] <sup>-</sup> |
| Energy [E <sub>h</sub> ]          | -232.023364                         | -592.048279                          | -548.016638                          | -427.164542                         | -232.292498                         | -592.290391                          | -548.257154                          | -427.400271                         | -232.329863                         | -592.337679                          | -548.306546                          | -427.440363                         |
| $r_1$ [Å]                         | 1.817                               | 2.175                                | 2.294                                | 2.470                               | 1.821                               | 2.183                                | 2.299                                | 2.474                               | 1.820                               | 2.180                                | 2.296                                | 2.472                               |
| $r_2$ [Å]                         | 1.083                               | 1.083                                | 1.083                                | 1.084                               | 1.073                               | 1.073                                | 1.073                                | 1.074                               | 1.071                               | 1.071                                | 1.072                                | 1.072                               |
| $r_3$ [Å]                         | 2.064                               | 2.244                                | 2.285                                | 2.332                               | 2.052                               | 2.236                                | 2.288                                | 2.340                               | 2.054                               | 2.238                                | 2.290                                | 2.341                               |
| $r_4$ [Å]                         | 1.200                               | 1.202                                | 1.202                                | 1.203                               | 1.173                               | 1.174                                | 1.174                                | 1.175                               | 1.173                               | 1.174                                | 1.175                                | 1.175                               |
| $a_1$ [deg]                       | 91.1                                | 94.8                                 | 95.7                                 | 96.7                                | 90.5                                | 94.4                                 | 95.4                                 | 96.4                                | 90.6                                | 94.5                                 | 95.5                                 | 96.5                                |
| ZPE [cm <sup>-1</sup> ]           | 9758                                | 9479                                 | 9352                                 | 9228                                | 9732                                | 9447                                 | 9346                                 | 9242                                | 9759                                | 9481                                 | 9364                                 | 9237                                |
| $\omega_1$ [cm <sup>-1</sup> ]    | 650i                                | 539i                                 | 490i                                 | 444i                                | 662i                                | 543i                                 | 481i                                 | 434i                                | 660i                                | 536i                                 | 474i                                 | 429i                                |
| $\omega_2$ [cm <sup>-1</sup> ]    | 105                                 | 76                                   | 67                                   | 58                                  | 107                                 | 68                                   | 70                                   | 66                                  | 112                                 | 82                                   | 73                                   | 63                                  |
| $\omega_3$ [cm <sup>-1</sup> ]    | 105                                 | 76                                   | 68                                   | 58                                  | 108                                 | 72                                   | 71                                   | 67                                  | 113                                 | 82                                   | 74                                   | 63                                  |
| $\omega_4$ [cm <sup>-1</sup> ]    | 332                                 | 253                                  | 212                                  | 194                                 | 322                                 | 247                                  | 205                                  | 186                                 | 323                                 | 249                                  | 207                                  | 185                                 |
| $\omega_5$ [cm <sup>-1</sup> ]    | 392                                 | 296                                  | 269                                  | 241                                 | 383                                 | 289                                  | 265                                  | 237                                 | 391                                 | 296                                  | 267                                  | 237                                 |
| $\omega_6$ [cm <sup>-1</sup> ]    | 392                                 | 296                                  | 269                                  | 241                                 | 383                                 | 289                                  | 267                                  | 237                                 | 391                                 | 296                                  | 267                                  | 238                                 |
| $\omega_7$ [cm <sup>-1</sup> ]    | 1123                                | 1027                                 | 989                                  | 947                                 | 1104                                | 1001                                 | 965                                  | 927                                 | 1110                                | 1007                                 | 970                                  | 924                                 |
| $\omega_8$ [cm <sup>-1</sup> ]    | 1123                                | 1027                                 | 989                                  | 947                                 | 1104                                | 1001                                 | 965                                  | 927                                 | 1111                                | 1007                                 | 970                                  | 924                                 |
| $\omega_9$ [cm <sup>-1</sup> ]    | 1171                                | 1081                                 | 1040                                 | 997                                 | 1156                                | 1062                                 | 1026                                 | 988                                 | 1155                                | 1065                                 | 1031                                 | 992                                 |
| $\omega_{10}$ [cm <sup>-1</sup> ] | 1390                                | 1399                                 | 1399                                 | 1398                                | 1389                                | 1400                                 | 1403                                 | 1409                                | 1394                                | 1406                                 | 1409                                 | 1410                                |
| $\omega_{11}$ [cm <sup>-1</sup> ] | 1390                                | 1399                                 | 1399                                 | 1398                                | 1389                                | 1401                                 | 1404                                 | 1409                                | 1394                                | 1406                                 | 1409                                 | 1411                                |
| $\omega_{12}$ [cm <sup>-1</sup> ] | 1994                                | 1979                                 | 1975                                 | 1971                                | 2131                                | 2118                                 | 2114                                 | 2111                                | 2126                                | 2114                                 | 2110                                 | 2107                                |
| $\omega_{13}$ [cm <sup>-1</sup> ] | 3191                                | 3208                                 | 3203                                 | 3197                                | 3167                                | 3186                                 | 3182                                 | 3180                                | 3170                                | 3188                                 | 3186                                 | 3180                                |
| $\omega_{14}$ [cm <sup>-1</sup> ] | 3404                                | 3420                                 | 3413                                 | 3404                                | 3361                                | 3381                                 | 3376                                 | 3370                                | 3364                                | 3382                                 | 3378                                 | 3370                                |
| $\omega_{15}$ [cm <sup>-1</sup> ] | 3404                                | 3420                                 | 3413                                 | 3404                                | 3362                                | 3381                                 | 3376                                 | 3370                                | 3364                                | 3382                                 | 3378                                 | 3370                                |

<sup>a</sup> For Br and I effective core potentials and the corresponding aug-cc-pVDZ-PP and aug-cc-pVTZ-PP basis sets are employed.

**Table S6.** Energies, structures, and frequencies for the DITS [Y = F, Cl, Br, I] double-inversion transition states ( $C_s$  symmetry) obtained at different levels of theory

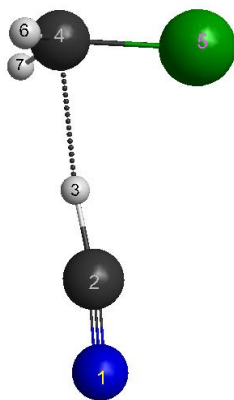

|   |   |   |       |   |       |   |        |  |  |  |  |
|---|---|---|-------|---|-------|---|--------|--|--|--|--|
| 1 | N |   |       |   |       |   |        |  |  |  |  |
| 2 | C | 1 | $r_1$ |   |       |   |        |  |  |  |  |
| 3 | H | 2 | $r_2$ | 1 | $a_1$ |   |        |  |  |  |  |
| 4 | C | 3 | $r_3$ | 2 | $a_2$ | 1 | 180.0  |  |  |  |  |
| 5 | Y | 4 | $r_4$ | 3 | $a_3$ | 2 | 0.0    |  |  |  |  |
| 6 | H | 4 | $r_5$ | 5 | $a_4$ | 3 | $d_1$  |  |  |  |  |
| 7 | H | 4 | $r_5$ | 5 | $a_4$ | 3 | $-d_1$ |  |  |  |  |

| Level <sup>a</sup>                | MP2/aug-cc-pVDZ                        |                                         |                                         |                                        | CCSD(T)-F12b/aug-cc-pVDZ               |                                         |                                         |                                        | CCSD(T)-F12b/aug-cc-pVTZ               |                                         |                                         |                                        |
|-----------------------------------|----------------------------------------|-----------------------------------------|-----------------------------------------|----------------------------------------|----------------------------------------|-----------------------------------------|-----------------------------------------|----------------------------------------|----------------------------------------|-----------------------------------------|-----------------------------------------|----------------------------------------|
|                                   | [FCH <sub>2</sub> ...HCN] <sup>-</sup> | [ClCH <sub>2</sub> ...HCN] <sup>-</sup> | [BrCH <sub>2</sub> ...HCN] <sup>-</sup> | [ICH <sub>2</sub> ...HCN] <sup>-</sup> | [FCH <sub>2</sub> ...HCN] <sup>-</sup> | [ClCH <sub>2</sub> ...HCN] <sup>-</sup> | [BrCH <sub>2</sub> ...HCN] <sup>-</sup> | [ICH <sub>2</sub> ...HCN] <sup>-</sup> | [FCH <sub>2</sub> ...HCN] <sup>-</sup> | [ClCH <sub>2</sub> ...HCN] <sup>-</sup> | [BrCH <sub>2</sub> ...HCN] <sup>-</sup> | [ICH <sub>2</sub> ...HCN] <sup>-</sup> |
| Energy [E <sub>h</sub> ]          | -231.956425                            | -591.985726                             | -547.953692                             | -427.104427                            | -232.229205                            | -592.229735                             | -548.193119                             | -427.339677                            | -232.266015                            | -592.276291                             | -548.242248                             | -427.379999                            |
| $r_1$ [Å]                         | 1.192                                  | 1.190                                   | 1.190                                   | 1.189                                  | 1.163                                  | 1.162                                   | 1.162                                   | 1.161                                  | 1.162                                  | 1.162                                   | 1.162                                   | 1.161                                  |
| $r_2$ [Å]                         | 1.201                                  | 1.169                                   | 1.166                                   | 1.157                                  | 1.168                                  | 1.145                                   | 1.145                                   | 1.137                                  | 1.164                                  | 1.144                                   | 1.142                                   | 1.134                                  |
| $r_3$ [Å]                         | 1.771                                  | 1.878                                   | 1.900                                   | 1.950                                  | 1.837                                  | 1.930                                   | 1.950                                   | 2.000                                  | 1.845                                  | 1.932                                   | 1.956                                   | 2.009                                  |
| $r_4$ [Å]                         | 1.449                                  | 1.795                                   | 1.931                                   | 2.112                                  | 1.426                                  | 1.768                                   | 1.922                                   | 2.094                                  | 1.427                                  | 1.774                                   | 1.924                                   | 2.095                                  |
| $r_5$ [Å]                         | 1.087                                  | 1.087                                   | 1.088                                   | 1.089                                  | 1.078                                  | 1.078                                   | 1.078                                   | 1.078                                  | 1.076                                  | 1.076                                   | 1.076                                   | 1.077                                  |
| $a_1$ [deg]                       | 168.8                                  | 170.9                                   | 171.7                                   | 173.4                                  | 171.4                                  | 172.4                                   | 173.5                                   | 174.7                                  | 171.3                                  | 172.5                                   | 173.3                                   | 174.5                                  |
| $a_2$ [deg]                       | 168.5                                  | 175.7                                   | 178.4                                   | 178.0                                  | 166.1                                  | 174.2                                   | 177.9                                   | 178.2                                  | 166.2                                  | 175.1                                   | 177.9                                   | 178.2                                  |
| $a_3$ [deg]                       | 81.4                                   | 83.5                                    | 84.8                                    | 87.4                                   | 79.3                                   | 82.2                                    | 84.2                                    | 87.1                                   | 78.9                                   | 82.1                                    | 83.9                                    | 86.9                                   |
| $a_4$ [deg]                       | 113.8                                  | 114.5                                   | 114.9                                   | 115.4                                  | 114.4                                  | 115.6                                   | 115.2                                   | 115.7                                  | 114.4                                  | 115.5                                   | 115.1                                   | 115.7                                  |
| $d_1$ [deg]                       | 79.6                                   | 79.0                                    | 79.4                                    | 79.6                                   | 81.7                                   | 80.1                                    | 81.1                                    | 81.0                                   | 82.1                                   | 80.8                                    | 81.4                                    | 81.3                                   |
| ZPE [cm <sup>-1</sup> ]           | 8464                                   | 8440                                    | 8352                                    | 8303                                   | 8569                                   | 8525                                    | 8435                                    | 8380                                   | 8594                                   | 8522                                    | 8412                                    | 8361                                   |
| $\omega_1$ [cm <sup>-1</sup> ]    | 1012i                                  | 827i                                    | 824i                                    | 798i                                   | 999i                                   | 814i                                    | 846i                                    | 808i                                   | 998i                                   | 826i                                    | 855i                                    | 816i                                   |
| $\omega_2$ [cm <sup>-1</sup> ]    | 89                                     | 86                                      | 73                                      | 65                                     | 91                                     | 86                                      | 68                                      | 60                                     | 93                                     | 86                                      | 72                                      | 63                                     |
| $\omega_3$ [cm <sup>-1</sup> ]    | 131                                    | 149                                     | 150                                     | 151                                    | 143                                    | 153                                     | 162                                     | 157                                    | 152                                    | 160                                     | 153                                     | 152                                    |
| $\omega_4$ [cm <sup>-1</sup> ]    | 193                                    | 189                                     | 179                                     | 169                                    | 195                                    | 200                                     | 190                                     | 180                                    | 198                                    | 198                                     | 188                                     | 178                                    |
| $\omega_5$ [cm <sup>-1</sup> ]    | 260                                    | 250                                     | 242                                     | 228                                    | 243                                    | 243                                     | 235                                     | 224                                    | 246                                    | 246                                     | 233                                     | 222                                    |
| $\omega_6$ [cm <sup>-1</sup> ]    | 352                                    | 362                                     | 359                                     | 350                                    | 313                                    | 324                                     | 346                                     | 332                                    | 325                                    | 341                                     | 332                                     | 321                                    |
| $\omega_7$ [cm <sup>-1</sup> ]    | 920                                    | 729                                     | 635                                     | 585                                    | 937                                    | 727                                     | 621                                     | 576                                    | 931                                    | 721                                     | 617                                     | 573                                    |
| $\omega_8$ [cm <sup>-1</sup> ]    | 1072                                   | 966                                     | 915                                     | 859                                    | 1071                                   | 970                                     | 910                                     | 851                                    | 1071                                   | 966                                     | 904                                     | 845                                    |
| $\omega_9$ [cm <sup>-1</sup> ]    | 1125                                   | 1068                                    | 1059                                    | 1050                                   | 1108                                   | 1057                                    | 1054                                    | 1039                                   | 1105                                   | 1050                                    | 1046                                    | 1035                                   |
| $\omega_{10}$ [cm <sup>-1</sup> ] | 1149                                   | 1112                                    | 1112                                    | 1099                                   | 1122                                   | 1080                                    | 1084                                    | 1071                                   | 1110                                   | 1069                                    | 1067                                    | 1051                                   |
| $\omega_{11}$ [cm <sup>-1</sup> ] | 1403                                   | 1363                                    | 1339                                    | 1316                                   | 1401                                   | 1371                                    | 1328                                    | 1306                                   | 1402                                   | 1359                                    | 1321                                    | 1299                                   |
| $\omega_{12}$ [cm <sup>-1</sup> ] | 1481                                   | 1716                                    | 1731                                    | 1775                                   | 1666                                   | 1871                                    | 1873                                    | 1921                                   | 1691                                   | 1871                                    | 1881                                    | 1928                                   |
| $\omega_{13}$ [cm <sup>-1</sup> ] | 2173                                   | 2328                                    | 2349                                    | 2414                                   | 2354                                   | 2492                                    | 2499                                    | 2563                                   | 2360                                   | 2490                                    | 2505                                    | 2573                                   |
| $\omega_{14}$ [cm <sup>-1</sup> ] | 3204                                   | 3201                                    | 3199                                    | 3191                                   | 3164                                   | 3164                                    | 3170                                    | 3162                                   | 3170                                   | 3169                                    | 3172                                    | 3163                                   |
| $\omega_{15}$ [cm <sup>-1</sup> ] | 3377                                   | 3361                                    | 3363                                    | 3353                                   | 3328                                   | 3312                                    | 3330                                    | 3318                                   | 3333                                   | 3320                                    | 3333                                    | 3320                                   |

<sup>a</sup> For Br and I effective core potentials and the corresponding aug-cc-pVDZ-PP and aug-cc-pVTZ-PP basis sets are employed.

**Table S7.** Energies, structures, and frequencies for the FSTS [Y = Cl, Br, I] front-side attack transition states ( $C_s$  symmetry) obtained at different levels of theory

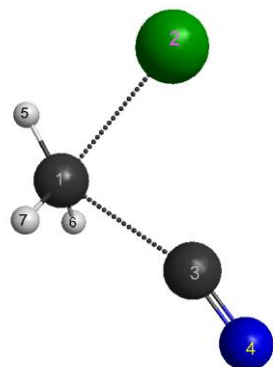

|   |   |   |       |   |       |   |        |  |  |
|---|---|---|-------|---|-------|---|--------|--|--|
| 1 | C |   |       |   |       |   |        |  |  |
| 2 | Y | 1 | $r_1$ |   |       |   |        |  |  |
| 3 | C | 1 | $r_2$ | 2 | $a_1$ |   |        |  |  |
| 4 | N | 3 | $r_3$ | 1 | $a_2$ | 2 | 180.0  |  |  |
| 5 | H | 1 | $r_4$ | 2 | $a_3$ | 3 | 180.0  |  |  |
| 6 | H | 1 | $r_5$ | 3 | $a_4$ | 2 | $d_1$  |  |  |
| 7 | H | 1 | $r_5$ | 3 | $a_4$ | 2 | $-d_1$ |  |  |

| Level <sup>a</sup>                | MP2/aug-cc-pVDZ                           |                                           |                                          | CCSD(T)-F12b/aug-cc-pVDZ                  |                                           |                                          | CCSD(T)-F12b/aug-cc-pVTZ                  |                                           |                                          |
|-----------------------------------|-------------------------------------------|-------------------------------------------|------------------------------------------|-------------------------------------------|-------------------------------------------|------------------------------------------|-------------------------------------------|-------------------------------------------|------------------------------------------|
|                                   | [Cl...CH <sub>3</sub> ...CN] <sup>-</sup> | [Br...CH <sub>3</sub> ...CN] <sup>-</sup> | [I...CH <sub>3</sub> ...CN] <sup>-</sup> | [Cl...CH <sub>3</sub> ...CN] <sup>-</sup> | [Br...CH <sub>3</sub> ...CN] <sup>-</sup> | [I...CH <sub>3</sub> ...CN] <sup>-</sup> | [Cl...CH <sub>3</sub> ...CN] <sup>-</sup> | [Br...CH <sub>3</sub> ...CN] <sup>-</sup> | [I...CH <sub>3</sub> ...CN] <sup>-</sup> |
| <b>Energy [E<sub>h</sub>]</b>     | -591.970938                               | -547.941014                               | -427.090216                              | -592.215326                               | -548.183904                               | -427.329017                              | -592.262523                               | -548.233513                               | -427.369511                              |
| $r_1$ [Å]                         | 2.326                                     | 2.482                                     | 2.715                                    | 2.374                                     | 2.548                                     | 2.795                                    | 2.374                                     | 2.543                                     | 2.795                                    |
| $r_2$ [Å]                         | 2.170                                     | 2.190                                     | 2.220                                    | 2.218                                     | 2.255                                     | 2.299                                    | 2.219                                     | 2.254                                     | 2.299                                    |
| $r_3$ [Å]                         | 1.203                                     | 1.203                                     | 1.204                                    | 1.175                                     | 1.175                                     | 1.175                                    | 1.175                                     | 1.175                                     | 1.175                                    |
| $r_4$ [Å]                         | 1.097                                     | 1.096                                     | 1.094                                    | 1.082                                     | 1.081                                     | 1.079                                    | 1.081                                     | 1.080                                     | 1.078                                    |
| $r_5$ [Å]                         | 1.092                                     | 1.091                                     | 1.091                                    | 1.080                                     | 1.080                                     | 1.079                                    | 1.079                                     | 1.078                                     | 1.078                                    |
| $a_1$ [deg]                       | 82.6                                      | 83.4                                      | 84.5                                     | 82.2                                      | 83.3                                      | 84.6                                     | 82.4                                      | 83.4                                      | 84.7                                     |
| $a_2$ [deg]                       | 160.6                                     | 159.4                                     | 159.9                                    | 160.7                                     | 159.9                                     | 159.6                                    | 160.4                                     | 159.6                                     | 159.3                                    |
| $a_3$ [deg]                       | 73.1                                      | 72.4                                      | 71.2                                     | 70.8                                      | 69.4                                      | 67.5                                     | 70.6                                      | 69.3                                      | 67.5                                     |
| $a_4$ [deg]                       | 80.9                                      | 80.5                                      | 80.0                                     | 79.6                                      | 78.7                                      | 77.8                                     | 79.5                                      | 78.7                                      | 77.8                                     |
| $d_1$ [deg]                       | 122.3                                     | 122.0                                     | 121.7                                    | 121.5                                     | 120.9                                     | 120.2                                    | 121.5                                     | 120.9                                     | 120.3                                    |
| <b>ZPE [cm<sup>-1</sup>]</b>      | 9196                                      | 9119                                      | 9026                                     | 9158                                      | 9074                                      | 8981                                     | 9163                                      | 9077                                      | 8965                                     |
| $\omega_1$ [cm <sup>-1</sup> ]    | 734i                                      | 711i                                      | 719i                                     | 712i                                      | 683i                                      | 689i                                     | 709i                                      | 682i                                      | 687i                                     |
| $\omega_2$ [cm <sup>-1</sup> ]    | 44                                        | 43                                        | 11                                       | 41i                                       | 47                                        | 18                                       | 93i                                       | 44i                                       | 77i                                      |
| $\omega_3$ [cm <sup>-1</sup> ]    | 74                                        | 62                                        | 47                                       | 81                                        | 68                                        | 50                                       | 81                                        | 68                                        | 45                                       |
| $\omega_4$ [cm <sup>-1</sup> ]    | 103                                       | 108                                       | 108                                      | 103                                       | 99                                        | 86                                       | 100                                       | 95                                        | 75                                       |
| $\omega_5$ [cm <sup>-1</sup> ]    | 229                                       | 198                                       | 179                                      | 208                                       | 178                                       | 159                                      | 208                                       | 179                                       | 159                                      |
| $\omega_6$ [cm <sup>-1</sup> ]    | 460                                       | 430                                       | 396                                      | 437                                       | 401                                       | 364                                      | 436                                       | 402                                       | 363                                      |
| $\omega_7$ [cm <sup>-1</sup> ]    | 896                                       | 876                                       | 834                                      | 854                                       | 816                                       | 751                                      | 854                                       | 817                                       | 752                                      |
| $\omega_8$ [cm <sup>-1</sup> ]    | 931                                       | 884                                       | 850                                      | 868                                       | 828                                       | 791                                      | 874                                       | 828                                       | 790                                      |
| $\omega_9$ [cm <sup>-1</sup> ]    | 1195                                      | 1165                                      | 1128                                     | 1152                                      | 1114                                      | 1070                                     | 1159                                      | 1122                                      | 1077                                     |
| $\omega_{10}$ [cm <sup>-1</sup> ] | 1431                                      | 1428                                      | 1425                                     | 1437                                      | 1434                                      | 1429                                     | 1440                                      | 1437                                      | 1431                                     |
| $\omega_{11}$ [cm <sup>-1</sup> ] | 1499                                      | 1494                                      | 1490                                     | 1494                                      | 1483                                      | 1475                                     | 1493                                      | 1486                                      | 1476                                     |
| $\omega_{12}$ [cm <sup>-1</sup> ] | 1960                                      | 1955                                      | 1949                                     | 2098                                      | 2097                                      | 2095                                     | 2094                                      | 2093                                      | 2091                                     |
| $\omega_{13}$ [cm <sup>-1</sup> ] | 3090                                      | 3100                                      | 3117                                     | 3105                                      | 3118                                      | 3130                                     | 3106                                      | 3117                                      | 3128                                     |
| $\omega_{14}$ [cm <sup>-1</sup> ] | 3205                                      | 3215                                      | 3232                                     | 3216                                      | 3237                                      | 3259                                     | 3219                                      | 3237                                      | 3258                                     |
| $\omega_{15}$ [cm <sup>-1</sup> ] | 3275                                      | 3280                                      | 3286                                     | 3260                                      | 3274                                      | 3285                                     | 3262                                      | 3274                                      | 3286                                     |

<sup>a</sup> For Br and I effective core potentials and the corresponding aug-cc-pVDZ-PP and aug-cc-pVTZ-PP basis sets are employed.



**Table S8.** Energies, structures, and frequencies for the FSTS [Y = F] front-side attack transition states ( $C_1$  symmetry) obtained at different levels of theory

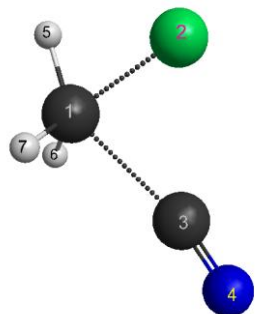

|   |   |   |       |   |       |   |       |  |
|---|---|---|-------|---|-------|---|-------|--|
| 1 | C |   |       |   |       |   |       |  |
| 2 | Y | 1 | $r_1$ |   |       |   |       |  |
| 3 | C | 1 | $r_2$ | 2 | $a_1$ |   |       |  |
| 4 | N | 3 | $r_3$ | 1 | $a_2$ | 2 | $d_1$ |  |
| 5 | H | 1 | $r_4$ | 2 | $a_3$ | 3 | $d_2$ |  |
| 6 | H | 1 | $r_5$ | 3 | $a_4$ | 2 | $d_3$ |  |
| 7 | H | 1 | $r_6$ | 3 | $a_5$ | 2 | $d_4$ |  |

| Level                              | MP2/aug-cc-pVDZ | CCSD(T)-F12b/aug-cc-pVDZ | CCSD(T)-F12b/aug-cc-pVTZ |
|------------------------------------|-----------------|--------------------------|--------------------------|
| Energy [ $E_h$ ]                   | -231.952746     | -232.222624              | -232.259936              |
| $r_1$ [Å]                          | 1.769           | 1.784                    | 1.787                    |
| $r_2$ [Å]                          | 2.007           | 2.028                    | 2.031                    |
| $r_3$ [Å]                          | 1.201           | 1.174                    | 1.174                    |
| $r_4$ [Å]                          | 1.115           | 1.100                    | 1.097                    |
| $r_5$ [Å]                          | 1.104           | 1.093                    | 1.091                    |
| $r_6$ [Å]                          | 1.095           | 1.084                    | 1.082                    |
| $a_1$ [deg]                        | 78.4            | 78.0                     | 78.1                     |
| $a_2$ [deg]                        | 165.1           | 165.5                    | 165.2                    |
| $a_3$ [deg]                        | 78.8            | 78.1                     | 78.0                     |
| $a_4$ [deg]                        | 81.8            | 80.7                     | 80.5                     |
| $a_5$ [deg]                        | 92.3            | 93.3                     | 93.1                     |
| $d_1$ [deg]                        | 195.6           | 191.1                    | 191.3                    |
| $d_2$ [deg]                        | 196.0           | 199.4                    | 199.2                    |
| $d_3$ [deg]                        | 143.9           | 147.2                    | 147.0                    |
| $d_4$ [deg]                        | -107.6          | -103.8                   | -103.9                   |
| ZPE [ $\text{cm}^{-1}$ ]           | 9442            | 9504                     | 9520                     |
| $\omega_1$ [ $\text{cm}^{-1}$ ]    | 738i            | 156i                     | 752i                     |
| $\omega_2$ [ $\text{cm}^{-1}$ ]    | 113             | 127                      | 124                      |
| $\omega_3$ [ $\text{cm}^{-1}$ ]    | 120             | 144                      | 139                      |
| $\omega_4$ [ $\text{cm}^{-1}$ ]    | 203             | 222                      | 228                      |
| $\omega_5$ [ $\text{cm}^{-1}$ ]    | 367             | 344                      | 342                      |
| $\omega_6$ [ $\text{cm}^{-1}$ ]    | 573             | 549                      | 549                      |
| $\omega_7$ [ $\text{cm}^{-1}$ ]    | 977             | 969                      | 969                      |
| $\omega_8$ [ $\text{cm}^{-1}$ ]    | 1118            | 1108                     | 1108                     |
| $\omega_9$ [ $\text{cm}^{-1}$ ]    | 1313            | 1303                     | 1309                     |
| $\omega_{10}$ [ $\text{cm}^{-1}$ ] | 1436            | 1445                     | 1451                     |
| $\omega_{11}$ [ $\text{cm}^{-1}$ ] | 1543            | 1546                     | 1550                     |
| $\omega_{12}$ [ $\text{cm}^{-1}$ ] | 1978            | 2108                     | 2103                     |
| $\omega_{13}$ [ $\text{cm}^{-1}$ ] | 2910            | 2940                     | 2948                     |
| $\omega_{14}$ [ $\text{cm}^{-1}$ ] | 3036            | 3020                     | 3031                     |
| $\omega_{15}$ [ $\text{cm}^{-1}$ ] | 3197            | 3184                     | 3189                     |

**Table S9.** Energies, structures, and frequencies for the HTS2 [Y = I] H-bonded transition states ( $C_s$  symmetry) obtained at different levels of theory

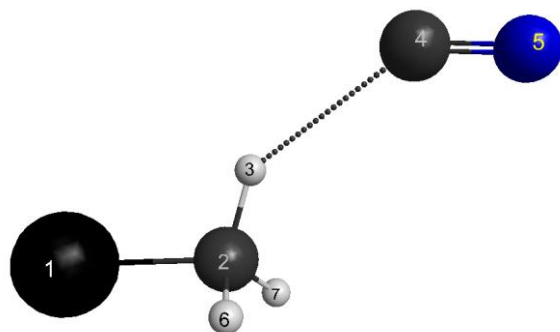

|   |   |   |       |   |       |   |        |
|---|---|---|-------|---|-------|---|--------|
| 1 | Y |   |       |   |       |   |        |
| 2 | C | 1 | $r_1$ |   |       |   |        |
| 3 | H | 2 | $r_2$ | 1 | $a_1$ |   |        |
| 4 | C | 3 | $r_3$ | 2 | $a_2$ | 1 | 180.0  |
| 5 | N | 4 | $r_4$ | 3 | $a_3$ | 2 | 0.0    |
| 6 | H | 2 | $r_5$ | 1 | $a_4$ | 3 | $d_1$  |
| 7 | H | 2 | $r_5$ | 1 | $a_4$ | 3 | $-d_1$ |

| Level <sup>a</sup>                | MP2/aug-cc-pVDZ | CCSD(T)-F12b/aug-cc-pVDZ | CCSD(T)-F12b/aug-cc-pVTZ |
|-----------------------------------|-----------------|--------------------------|--------------------------|
| <b>Energy [E<sub>h</sub>]</b>     | -427.170572     | -427.406481              | -427.446201              |
| $r_1$ [Å]                         | 2.172           | 2.158                    | 2.159                    |
| $r_2$ [Å]                         | 1.103           | 1.090                    | 1.089                    |
| $r_3$ [Å]                         | 2.264           | 2.329                    | 2.324                    |
| $r_4$ [Å]                         | 1.206           | 1.179                    | 1.179                    |
| $r_5$ [Å]                         | 1.096           | 1.086                    | 1.084                    |
| $a_1$ [deg]                       | 109.3           | 109.7                    | 109.5                    |
| $a_2$ [deg]                       | 151.3           | 140.5                    | 141.4                    |
| $a_3$ [deg]                       | 165.5           | 137.9                    | 140.5                    |
| $a_4$ [deg]                       | 106.5           | 106.6                    | 106.4                    |
| $d_1$ [deg]                       | 120.6           | 120.4                    | 120.5                    |
| <b>ZPE [cm<sup>-1</sup>]</b>      | 9187            | 9207                     | 9213                     |
| $\omega_1$ [cm <sup>-1</sup> ]    | 30i             | 37i                      | 33i                      |
| $\omega_2$ [cm <sup>-1</sup> ]    | 28              | 26                       | 28                       |
| $\omega_3$ [cm <sup>-1</sup> ]    | 39              | 29                       | 35                       |
| $\omega_4$ [cm <sup>-1</sup> ]    | 163             | 149                      | 150                      |
| $\omega_5$ [cm <sup>-1</sup> ]    | 187             | 150                      | 150                      |
| $\omega_6$ [cm <sup>-1</sup> ]    | 529             | 522                      | 520                      |
| $\omega_7$ [cm <sup>-1</sup> ]    | 901             | 885                      | 888                      |
| $\omega_8$ [cm <sup>-1</sup> ]    | 916             | 910                      | 909                      |
| $\omega_9$ [cm <sup>-1</sup> ]    | 1291            | 1290                     | 1293                     |
| $\omega_{10}$ [cm <sup>-1</sup> ] | 1444            | 1461                     | 1465                     |
| $\omega_{11}$ [cm <sup>-1</sup> ] | 1471            | 1485                     | 1490                     |
| $\omega_{12}$ [cm <sup>-1</sup> ] | 1949            | 2079                     | 2075                     |
| $\omega_{13}$ [cm <sup>-1</sup> ] | 3039            | 3052                     | 3048                     |
| $\omega_{14}$ [cm <sup>-1</sup> ] | 3189            | 3175                     | 3173                     |
| $\omega_{15}$ [cm <sup>-1</sup> ] | 3229            | 3201                     | 3203                     |

<sup>a</sup> For I effective core potentials and the corresponding aug-cc-pVDZ-PP and aug-cc-pVTZ-PP basis sets are employed.

**Table S10.** Energies, structures, and frequencies for the PostHMIN2 [Y = F, Cl, Br, I] H-bonded complexes ( $C_s$  symmetry) obtained at different levels of theory

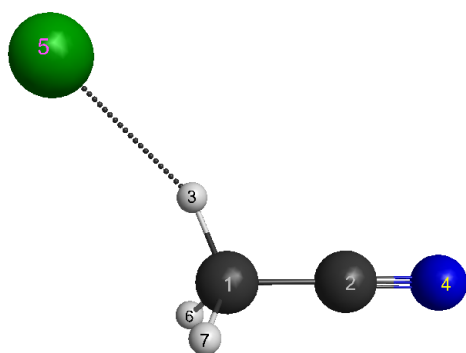

|   |   |   |       |   |       |   |        |
|---|---|---|-------|---|-------|---|--------|
| 1 | C |   |       |   |       |   |        |
| 2 | C | 1 | $r_1$ |   |       |   |        |
| 3 | H | 1 | $r_2$ | 2 | $a_1$ |   |        |
| 4 | N | 2 | $r_3$ | 1 | $a_2$ | 3 | 0.0    |
| 5 | Y | 3 | $r_4$ | 1 | $a_3$ | 2 | 180.0  |
| 6 | H | 1 | $r_5$ | 2 | $a_4$ | 3 | $d_1$  |
| 7 | H | 1 | $r_5$ | 2 | $a_4$ | 3 | $-d_1$ |

| Level <sup>a</sup>                | MP2/aug-cc-pVDZ                      |                                       |                                       |                                      | CCSD(T)-F12b/aug-cc-pVDZ             |                                       |                                       | CCSD(T)-F12b/aug-cc-pVTZ             |                                       |                                       |
|-----------------------------------|--------------------------------------|---------------------------------------|---------------------------------------|--------------------------------------|--------------------------------------|---------------------------------------|---------------------------------------|--------------------------------------|---------------------------------------|---------------------------------------|
|                                   | F <sup>-</sup> ...CH <sub>3</sub> CN | Cl <sup>-</sup> ...CH <sub>3</sub> CN | Br <sup>-</sup> ...CH <sub>3</sub> CN | I <sup>-</sup> ...CH <sub>3</sub> CN | F <sup>-</sup> ...CH <sub>3</sub> CN | Cl <sup>-</sup> ...CH <sub>3</sub> CN | Br <sup>-</sup> ...CH <sub>3</sub> CN | F <sup>-</sup> ...CH <sub>3</sub> CN | Cl <sup>-</sup> ...CH <sub>3</sub> CN | Br <sup>-</sup> ...CH <sub>3</sub> CN |
| Energy [E <sub>h</sub> ]          | -232.087315                          | -592.129206                           | -548.100883                           | -427.253228                          | -232.352791                          | -592.366759                           | -548.337614                           | -232.390196                          | -592.414231                           | -548.387173                           |
| $r_1$ [Å]                         | 1.463                                | 1.469                                 | 1.469                                 | 1.470                                | 1.456                                | 1.462                                 | 1.462                                 | 1.454                                | 1.461                                 | 1.461                                 |
| $r_2$ [Å]                         | 1.175                                | 1.111                                 | 1.108                                 | 1.103                                | 1.167                                | 1.102                                 | 1.097                                 | 1.166                                | 1.100                                 | 1.096                                 |
| $r_3$ [Å]                         | 1.190                                | 1.187                                 | 1.187                                 | 1.187                                | 1.163                                | 1.160                                 | 1.160                                 | 1.163                                | 1.160                                 | 1.160                                 |
| $r_4$ [Å]                         | 1.503                                | 2.338                                 | 2.531                                 | 2.861                                | 1.489                                | 2.333                                 | 2.564                                 | 1.489                                | 2.335                                 | 2.564                                 |
| $r_5$ [Å]                         | 1.102                                | 1.099                                 | 1.100                                 | 1.099                                | 1.093                                | 1.091                                 | 1.091                                 | 1.092                                | 1.089                                 | 1.089                                 |
| $a_1$ [deg]                       | 113.5                                | 112.8                                 | 112.7                                 | 112.4                                | 113.5                                | 113.0                                 | 112.9                                 | 113.5                                | 113.0                                 | 112.9                                 |
| $a_2$ [deg]                       | 179.8                                | 181.0                                 | 181.0                                 | 180.5                                | 180.0                                | 181.0                                 | 180.9                                 | 180.0                                | 181.0                                 | 180.9                                 |
| $a_3$ [deg]                       | 172.2                                | 157.6                                 | 153.6                                 | 140.3                                | 172.0                                | 154.3                                 | 146.5                                 | 172.2                                | 153.5                                 | 146.5                                 |
| $a_4$ [deg]                       | 108.7                                | 109.3                                 | 109.5                                 | 109.9                                | 108.6                                | 109.4                                 | 109.6                                 | 108.7                                | 109.4                                 | 109.6                                 |
| $d_1$ [deg]                       | 121.0                                | 120.4                                 | 120.3                                 | 120.0                                | 121.0                                | 120.3                                 | 120.2                                 | 121.0                                | 120.3                                 | 120.2                                 |
| ZPE [cm <sup>-1</sup> ]           | 9680                                 | 9926                                  | 9911                                  | 9874                                 | 9725                                 | 9979                                  | 9956                                  | 9738                                 | 9985                                  | 9966                                  |
| $\omega_1$ [cm <sup>-1</sup> ]    | 98                                   | 50                                    | 39                                    | 2                                    | 98                                   | 47                                    | 22                                    | 98                                   | 47                                    | 34                                    |
| $\omega_2$ [cm <sup>-1</sup> ]    | 296                                  | 149                                   | 118                                   | 88                                   | 293                                  | 145                                   | 110                                   | 293                                  | 147                                   | 109                                   |
| $\omega_3$ [cm <sup>-1</sup> ]    | 309                                  | 176                                   | 153                                   | 106                                  | 310                                  | 166                                   | 132                                   | 309                                  | 155                                   | 122                                   |
| $\omega_4$ [cm <sup>-1</sup> ]    | 403                                  | 375                                   | 373                                   | 366                                  | 413                                  | 384                                   | 379                                   | 412                                  | 383                                   | 381                                   |
| $\omega_5$ [cm <sup>-1</sup> ]    | 431                                  | 380                                   | 375                                   | 370                                  | 443                                  | 389                                   | 382                                   | 443                                  | 389                                   | 382                                   |
| $\omega_6$ [cm <sup>-1</sup> ]    | 936                                  | 927                                   | 927                                   | 925                                  | 927                                  | 919                                   | 918                                   | 928                                  | 919                                   | 918                                   |
| $\omega_7$ [cm <sup>-1</sup> ]    | 1004                                 | 1016                                  | 1015                                  | 1009                                 | 1017                                 | 1026                                  | 1023                                  | 1021                                 | 1030                                  | 1028                                  |
| $\omega_8$ [cm <sup>-1</sup> ]    | 1084                                 | 1055                                  | 1051                                  | 1044                                 | 1096                                 | 1067                                  | 1060                                  | 1100                                 | 1068                                  | 1063                                  |
| $\omega_9$ [cm <sup>-1</sup> ]    | 1419                                 | 1390                                  | 1385                                  | 1372                                 | 1441                                 | 1409                                  | 1402                                  | 1446                                 | 1413                                  | 1406                                  |
| $\omega_{10}$ [cm <sup>-1</sup> ] | 1451                                 | 1448                                  | 1447                                  | 1446                                 | 1469                                 | 1464                                  | 1466                                  | 1472                                 | 1468                                  | 1468                                  |
| $\omega_{11}$ [cm <sup>-1</sup> ] | 1487                                 | 1464                                  | 1459                                  | 1453                                 | 1504                                 | 1483                                  | 1476                                  | 1511                                 | 1486                                  | 1481                                  |
| $\omega_{12}$ [cm <sup>-1</sup> ] | 2057                                 | 2165                                  | 2166                                  | 2167                                 | 2018                                 | 2288                                  | 2290                                  | 2016                                 | 2283                                  | 2286                                  |
| $\omega_{13}$ [cm <sup>-1</sup> ] | 2158                                 | 2957                                  | 3002                                  | 3060                                 | 2268                                 | 2943                                  | 3004                                  | 2264                                 | 2943                                  | 3001                                  |
| $\omega_{14}$ [cm <sup>-1</sup> ] | 3083                                 | 3124                                  | 3132                                  | 3154                                 | 3051                                 | 3092                                  | 3106                                  | 3055                                 | 3096                                  | 3106                                  |
| $\omega_{15}$ [cm <sup>-1</sup> ] | 3145                                 | 3176                                  | 3179                                  | 3187                                 | 3103                                 | 3137                                  | 3144                                  | 3107                                 | 3141                                  | 3146                                  |

<sup>a</sup> For Br and I effective core potentials and the corresponding aug-cc-pVDZ-PP and aug-cc-pVTZ-PP basis sets are employed.

**Table S11.** Energies, structures, and frequencies for the WaldenPostMIN [Y = Cl, Br, I] ion-dipole complexes ( $C_{3v}$  symmetry)<sup>a</sup> obtained at different levels of theory

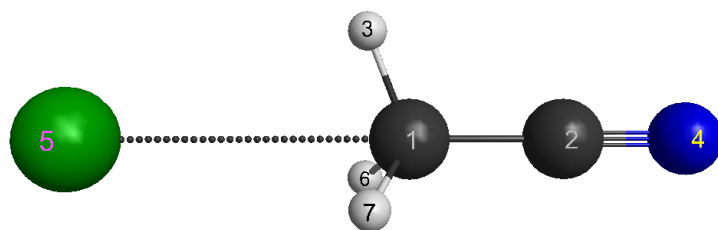

|   |   |   |       |   |       |   |        |  |  |
|---|---|---|-------|---|-------|---|--------|--|--|
| 1 | C |   |       |   |       |   |        |  |  |
| 2 | C | 1 | $r_1$ |   |       |   |        |  |  |
| 3 | H | 1 | $r_2$ | 2 | $a_1$ |   |        |  |  |
| 4 | N | 2 | $r_3$ | 1 | $a_2$ | 3 | 0.0    |  |  |
| 5 | Y | 1 | $r_4$ | 3 | $a_3$ | 2 | 180.0  |  |  |
| 6 | H | 1 | $r_5$ | 2 | $a_4$ | 3 | $d_1$  |  |  |
| 7 | H | 1 | $r_5$ | 2 | $a_4$ | 3 | $-d_1$ |  |  |

| Level <sup>b</sup>                | MP2/aug-cc-pVDZ                       |                                       |                                      | CCSD(T)-F12b/aug-cc-pVDZ              |                                       |                                      | CCSD(T)-F12b/aug-cc-pVTZ              |                                       |                                      |
|-----------------------------------|---------------------------------------|---------------------------------------|--------------------------------------|---------------------------------------|---------------------------------------|--------------------------------------|---------------------------------------|---------------------------------------|--------------------------------------|
|                                   | Cl <sup>-</sup> ...CH <sub>3</sub> CN | Br <sup>-</sup> ...CH <sub>3</sub> CN | I <sup>-</sup> ...CH <sub>3</sub> CN | Cl <sup>-</sup> ...CH <sub>3</sub> CN | Br <sup>-</sup> ...CH <sub>3</sub> CN | I <sup>-</sup> ...CH <sub>3</sub> CN | Cl <sup>-</sup> ...CH <sub>3</sub> CN | Br <sup>-</sup> ...CH <sub>3</sub> CN | I <sup>-</sup> ...CH <sub>3</sub> CN |
| Energy [E <sub>h</sub> ]          | -592.128793                           | -548.100913                           | -427.253603                          | -592.366431                           | -548.337748                           | -427.485942                          | -592.413861                           | -548.387304                           | -427.526543                          |
| $r_1$ [Å]                         | 1.473                                 | 1.473                                 | 1.472                                | 1.465                                 | 1.465                                 | 1.465                                | 1.464                                 | 1.464                                 | 1.464                                |
| $r_2$ [Å]                         | 1.097                                 | 1.097                                 | 1.098                                | 1.088                                 | 1.089                                 | 1.089                                | 1.087                                 | 1.087                                 | 1.087                                |
| $r_3$ [Å]                         | 1.187                                 | 1.187                                 | 1.187                                | 1.160                                 | 1.160                                 | 1.160                                | 1.160                                 | 1.160                                 | 1.160                                |
| $r_4$ [Å]                         | 3.226                                 | 3.395                                 | 3.633                                | 3.204                                 | 3.375                                 | 3.624                                | 3.205                                 | 3.385                                 | 3.644                                |
| $r_5$ [Å]                         | 1.097                                 | 1.097                                 | 1.098                                | 1.088                                 | 1.089                                 | 1.089                                | 1.087                                 | 1.087                                 | 1.087                                |
| $a_1$ [deg]                       | 111.4                                 | 111.2                                 | 111.1                                | 111.4                                 | 111.2                                 | 111.1                                | 111.4                                 | 111.2                                 | 111.0                                |
| $a_2$ [deg]                       | 180.0                                 | 180.0                                 | 180.0                                | 180.0                                 | 180.0                                 | 180.0                                | 180.0                                 | 180.0                                 | 180.0                                |
| $a_3$ [deg]                       | 68.6                                  | 69.0                                  | 69.2                                 | 68.6                                  | 69.0                                  | 69.2                                 | 68.6                                  | 69.0                                  | 69.2                                 |
| $a_4$ [deg]                       | 111.4                                 | 111.3                                 | 111.2                                | 111.4                                 | 111.3                                 | 111.1                                | 111.4                                 | 111.3                                 | 111.0                                |
| $d_1$ [deg]                       | 120.0                                 | 120.0                                 | 119.9                                | 120.0                                 | 120.0                                 | 120.0                                | 120.0                                 | 120.0                                 | 120.0                                |
| ZPE [cm <sup>-1</sup> ]           | 9876                                  | 9872                                  | 9871                                 | 9874                                  | 9911                                  | 9931                                 | 9941                                  | 9938                                  | 9940                                 |
| $\omega_1$ [cm <sup>-1</sup> ]    | 38                                    | 39                                    | 39                                   | 29i                                   | 26                                    | 37                                   | 30                                    | 34                                    | 35                                   |
| $\omega_2$ [cm <sup>-1</sup> ]    | 38                                    | 39                                    | 39                                   | 29i                                   | 27                                    | 37                                   | 34                                    | 36                                    | 36                                   |
| $\omega_3$ [cm <sup>-1</sup> ]    | 120                                   | 93                                    | 79                                   | 119                                   | 97                                    | 79                                   | 119                                   | 92                                    | 77                                   |
| $\omega_4$ [cm <sup>-1</sup> ]    | 371                                   | 370                                   | 369                                  | 361                                   | 370                                   | 376                                  | 378                                   | 378                                   | 377                                  |
| $\omega_5$ [cm <sup>-1</sup> ]    | 371                                   | 370                                   | 369                                  | 361                                   | 370                                   | 376                                  | 379                                   | 378                                   | 377                                  |
| $\omega_6$ [cm <sup>-1</sup> ]    | 913                                   | 314                                   | 916                                  | 904                                   | 906                                   | 907                                  | 905                                   | 907                                   | 908                                  |
| $\omega_7$ [cm <sup>-1</sup> ]    | 1005                                  | 1009                                  | 1014                                 | 1011                                  | 1021                                  | 1028                                 | 1021                                  | 1025                                  | 1031                                 |
| $\omega_8$ [cm <sup>-1</sup> ]    | 1005                                  | 1010                                  | 1014                                 | 1011                                  | 1021                                  | 1028                                 | 1021                                  | 1026                                  | 1032                                 |
| $\omega_9$ [cm <sup>-1</sup> ]    | 1335                                  | 1341                                  | 1348                                 | 1359                                  | 1367                                  | 1374                                 | 1364                                  | 1372                                  | 1381                                 |
| $\omega_{10}$ [cm <sup>-1</sup> ] | 1432                                  | 1435                                  | 1439                                 | 1453                                  | 1455                                  | 1459                                 | 1458                                  | 1461                                  | 1465                                 |
| $\omega_{11}$ [cm <sup>-1</sup> ] | 1432                                  | 1435                                  | 1439                                 | 1453                                  | 1455                                  | 1460                                 | 1458                                  | 1461                                  | 1465                                 |
| $\omega_{12}$ [cm <sup>-1</sup> ] | 2162                                  | 2164                                  | 2166                                 | 2287                                  | 2289                                  | 2291                                 | 2282                                  | 2284                                  | 2287                                 |
| $\omega_{13}$ [cm <sup>-1</sup> ] | 3113                                  | 3110                                  | 3106                                 | 3090                                  | 3085                                  | 3082                                 | 3090                                  | 3086                                  | 3081                                 |
| $\omega_{14}$ [cm <sup>-1</sup> ] | 3208                                  | 3206                                  | 3202                                 | 3170                                  | 3166                                  | 3164                                 | 3171                                  | 3167                                  | 3164                                 |
| $\omega_{15}$ [cm <sup>-1</sup> ] | 3208                                  | 3207                                  | 3203                                 | 3170                                  | 3167                                  | 3164                                 | 3171                                  | 3168                                  | 3164                                 |

<sup>a</sup> The computations are performed using  $C_s$  symmetry, but the  $C_{3v}$  symmetry, with collinear Y(5), C(1), C(2), N(4) atoms, is numerically obtained.

<sup>b</sup> For Br and I effective core potentials and the corresponding aug-cc-pVDZ-PP and aug-cc-pVTZ-PP basis sets are employed.
